# Supplementary material
Source: PubMed Central journal article supplement (PMC3291810)
Supplement: NIHMS324032-supplement-1.pdf [file NIHMS324032-supplement-1.pdf]

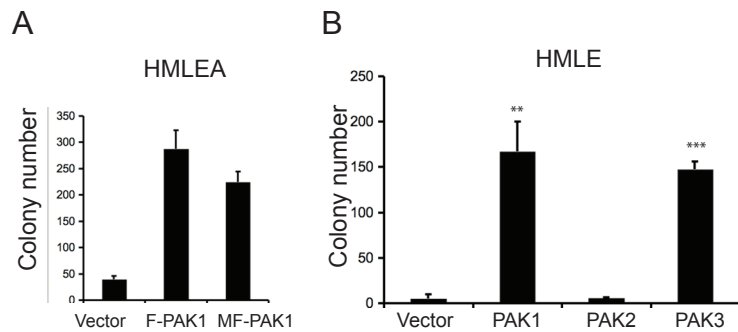

**Supplemental Figure 1: Examining myristoylation requirement of PAK1 and ability of group I PAKs to promote anchorage-independent growth.** A. Anchorage-independent colonies formed by HMLEA cells expressing pBP, pBP-Flag-PAK1 or pBP-Myr-Flag-PAK1. B. Colony formation by HMLE cells expressing a vector control, *PAK1*, *PAK2* or *PAK3*. \*\*p-value = 0.0012, \*\*\*p-value <0.0001.
