# Supplementary material
Source: PubMed Central journal article supplement (PMC3291810)
Supplement: NIHMS324032-supplement-2.pdf [file NIHMS324032-supplement-2.pdf]

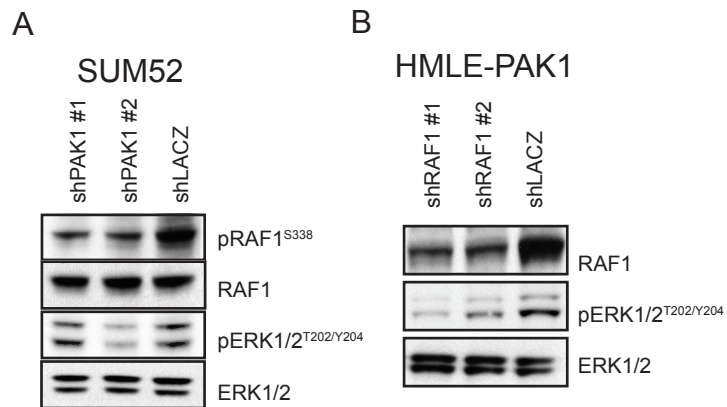

**Supplemental Figure 2: PAK1-mediated MAPK signaling occurs through RAF1.** A. Phosphorylation levels of RAF1<sup>S338</sup> and ERK1/2<sup>T202/Y204</sup> in SUM52 expressing *PAK1*- or *lacZ*-specific shRNAs. B. Phosphorylation levels of ERK1/2<sup>T202/Y204</sup> in HMLE-PAK1 cells expressing *RAF1*- or *lacZ*-specific shRNAs. Corresponding levels of RAF1 and total ERK1/2 are shown.
