# Supplementary material
Source: PubMed Central journal article supplement (PMC3291810)
Supplement: NIHMS324032-supplement-3.pdf [file NIHMS324032-supplement-3.pdf]

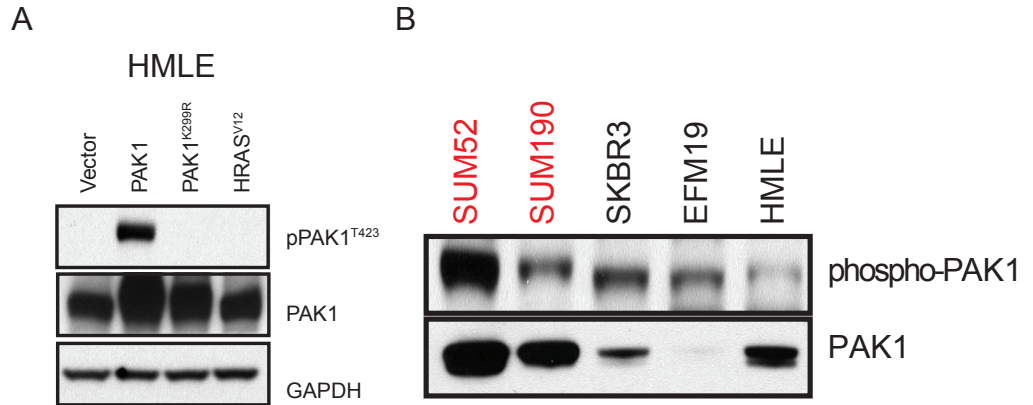

**Supplemental Figure 3: Total and phosphorylated levels of PAK1 in HMLE derivatives or breast cancer cell lines.** A. Immunoblots showing total or phospho-PAK1<sup>T423</sup> in HMLEs expressing a control vector, PAK1, PAK1<sup>K299R</sup> or HRAS<sup>V12</sup>. B. Immunoblots showing total and phospho-PAK1<sup>T423</sup> levels in cell lines with (RED) or without (BLACK) *PAK1* amplification.
