# Supplementary material
Source: PubMed Central journal article supplement (PMC3291810)
Supplement: NIHMS324032-supplement-4.pdf [file NIHMS324032-supplement-4.pdf]

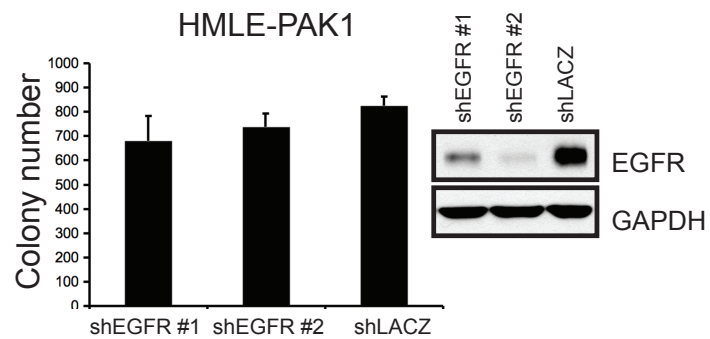

**Supplemental Figure 4: Suppression of *EGFR* in HMLE-PAK1 does not alter PAK1-mediated colony formation.** Anchorage-independent growth of HMLE-PAK1 expressing shRNAs specific for *EGFR* or *lacZ*. Error bars = 1 SD. EGFR protein levels are shown.
