# Supplementary material
Source: PubMed Central journal article supplement (PMC3291810)
Supplement: NIHMS324032-supplement-6.pdf [file NIHMS324032-supplement-6.pdf]

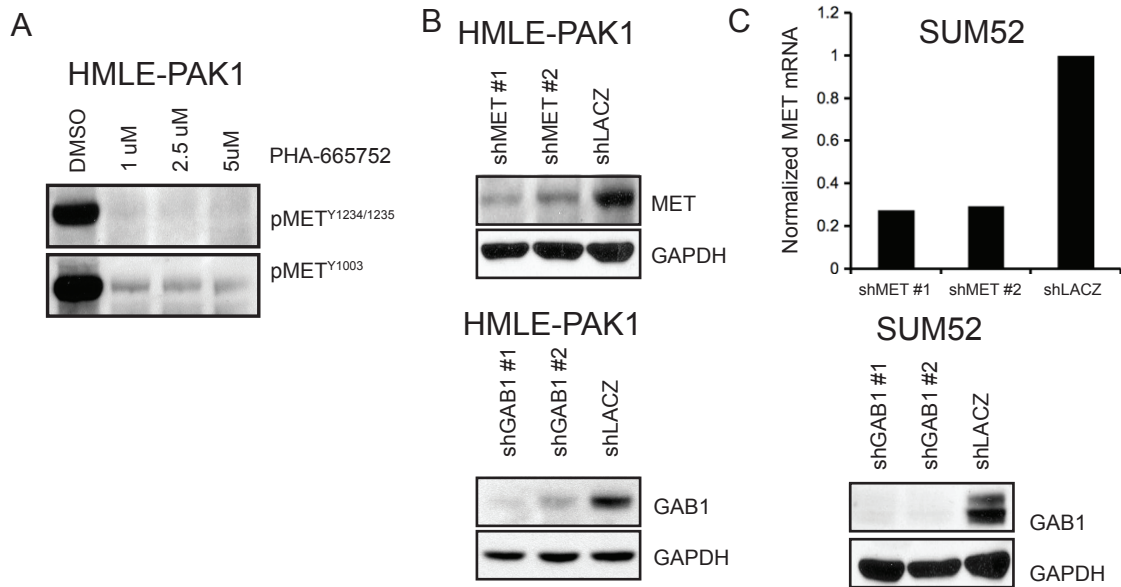

**Supplemental Figure 6: Validation of MET signaling inhibition.** A. Immunoblots showing phospho-MET<sup>Y1234/1235</sup> and phospho-MET<sup>Y1003</sup> in HMLE-PAK1 cells treated with PHA-665752 at indicated doses. B. Immunoblots showing MET or GAB1 in HMLE-PAK1 expressing *MET*, *GAB1* or *lacZ*-specific shRNAs. C. *MET* mRNA in SUM52 expressing *MET*- or *lacZ*-specific shRNAs. Immunoblots showing GAB1 in SUM52 cells expressing *GAB1*- or *lacZ*-specific shRNAs.
