# Supplementary material
Source: PubMed Central journal article supplement (PMC3291810)
Supplement: NIHMS324032-supplement-7.pdf [file NIHMS324032-supplement-7.pdf]

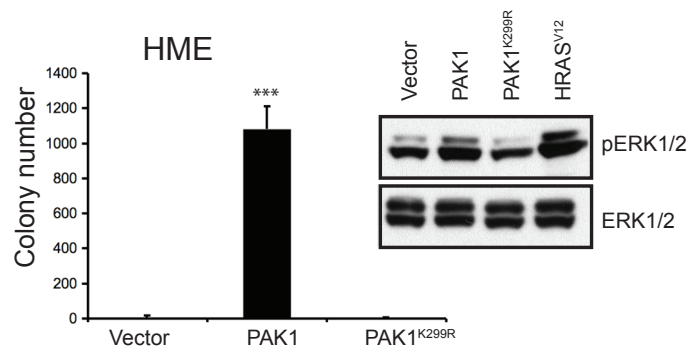

**Supplemental Figure 7: Expression of *PAK1* activates the MAPK pathway and transforms HME cells.**

Anchorage-independent colonies formed by human mammary epithelial cells expressing hTERT (HME) and vector control, PAK1 or PAK1<sup>K299R</sup>. Immunoblots showing phospho-ERK1/2 levels in HME cells expressing vector control, PAK1, PAK1<sup>K299R</sup> or HRAS<sup>V12</sup>.
