# Supplementary material
Source: PubMed Central journal article supplement (PMC3291810)
Supplement: NIHMS324032-supplement-8.pdf [file NIHMS324032-supplement-8.pdf]

**Supplemental Table 1: Primers used for site-directed mutagenesis (A) or qRT-PCR (B).**

**A**

| <b>Gene</b> | <b>Mutation</b> | <b>Sense Primer 5'-3'</b>                           | <b>Anti-sense Primer 5'-3'</b>                      |
|-------------|-----------------|-----------------------------------------------------|-----------------------------------------------------|
| PAK1        | K299R           | GGA CAG GAG GTG<br>GCC ATT AGG CAG<br>ATG AAT CTT C | GAA GAT TCA TCT GCC<br>TAA TGG CCA CCT CCT<br>GTC C |

**B**

| <b>Gene</b> | <b>Forward Primer 5'-3'</b> | <b>Reverse Primer 5'-3'</b>    |
|-------------|-----------------------------|--------------------------------|
| PAK1        | CAG CCC CTC CGA TGA GAA ATA | CAA AAC CGA CAT GAA TTG TGT GT |
| RAF1        | TTT CCT GGA TCA TGT TCC CCT | ACT TTG GTG CTA CAG TGC TCA    |
| NF2         | TTG CGA GAT GAA GTG GAA AGG | CCA GAA GTG AAA GGT GAC TGG TT |
| MET         | TGG TGC AGA GGA GCAATG G    | CAT TCT GGA TGG GTG TTT CCG    |
| GAB1        | GAT GGT TCG TGT TAC GCA GTG | CGC TGT CTG CTA CCAAGT AGA A   |
